# Supplementary material for: Effect of N-Acetylcysteine Administration on 30-Day Mortality in Critically Ill Patients with Septic Shock Caused by Carbapenem-Resistant Klebsiella pneumoniae and Acinetobacter baumannii: A Retrospective Case-Control Study
Source: MDPI journal article supplement (doi:10.3390/antibiotics10030271), 2021-03-08

**Supplementary Figure1.** Treatment protocol in critically ill patients with suspected Gram-negative infection implemented by Infectious Diseases consultants at the Intensive Care Unit of IRCCS Neuromed (Pozzilli) and Sapienza University of Rome.

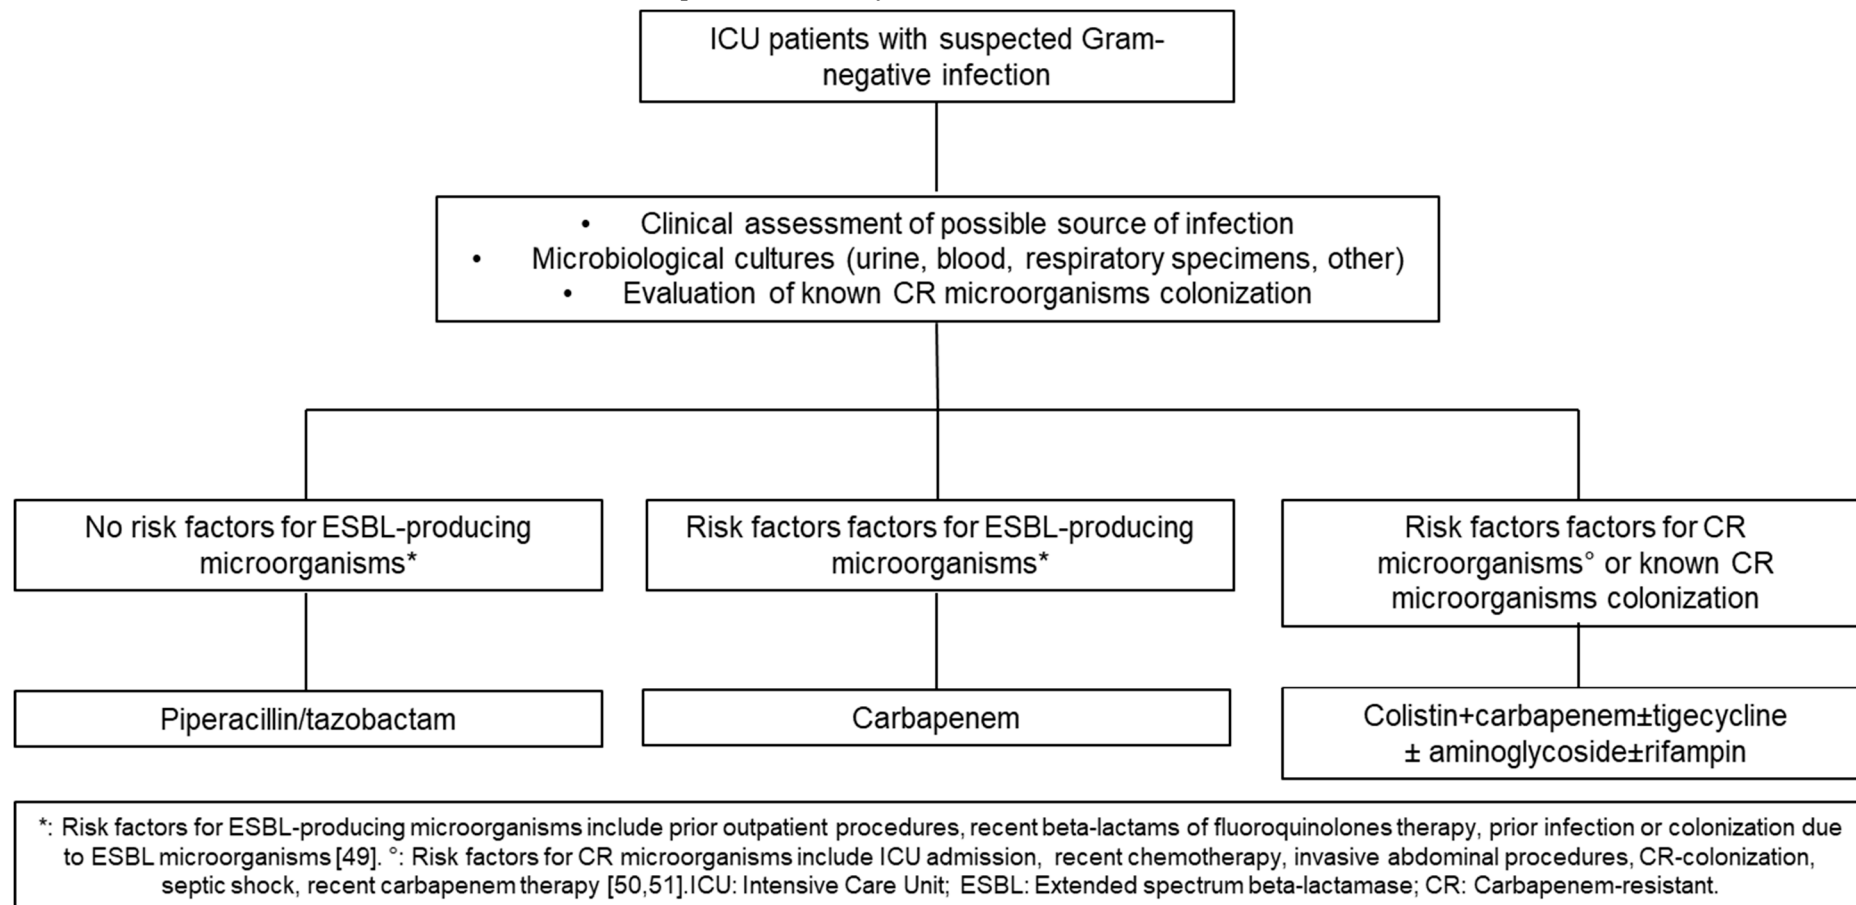

Supplement: s1 [file s1]
